# Supplementary material for: Assessment of contemporary genetic diversity and inter-taxa/inter-region exchange of avian paramyxovirus serotype 1 in wild birds sampled in North America
Source: Springer Nature journal article supplement (doi:10.1186/s12985-017-0714-8), 2017-03-02

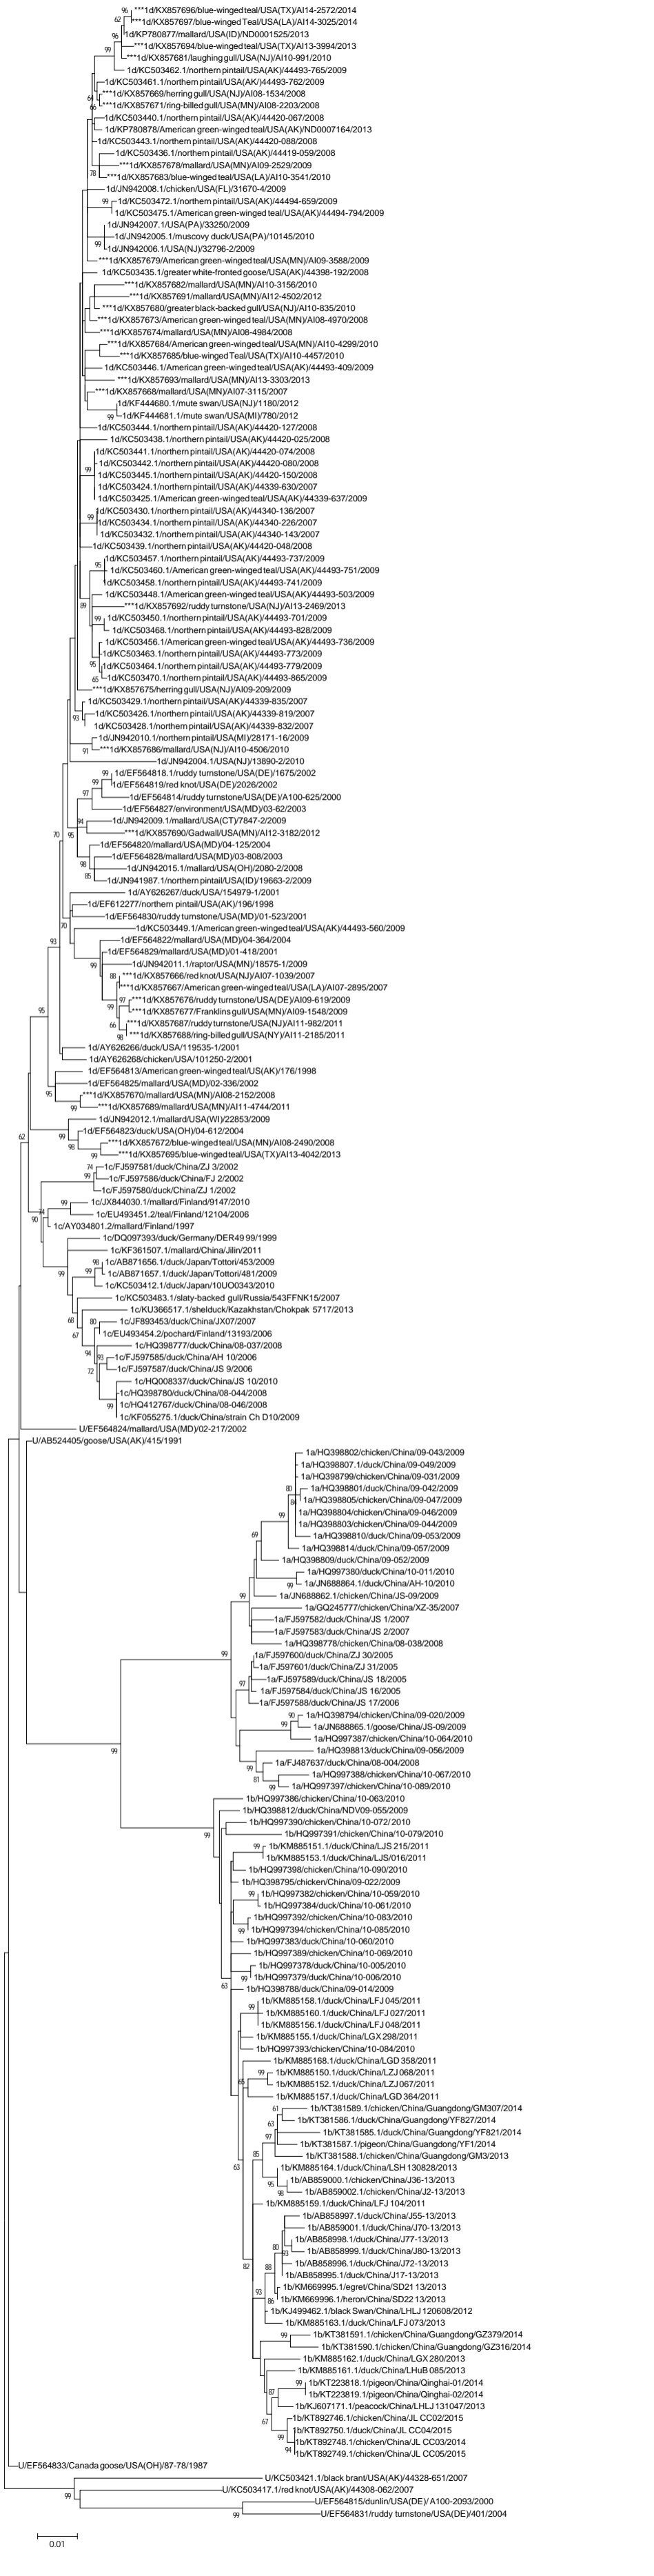

0.01



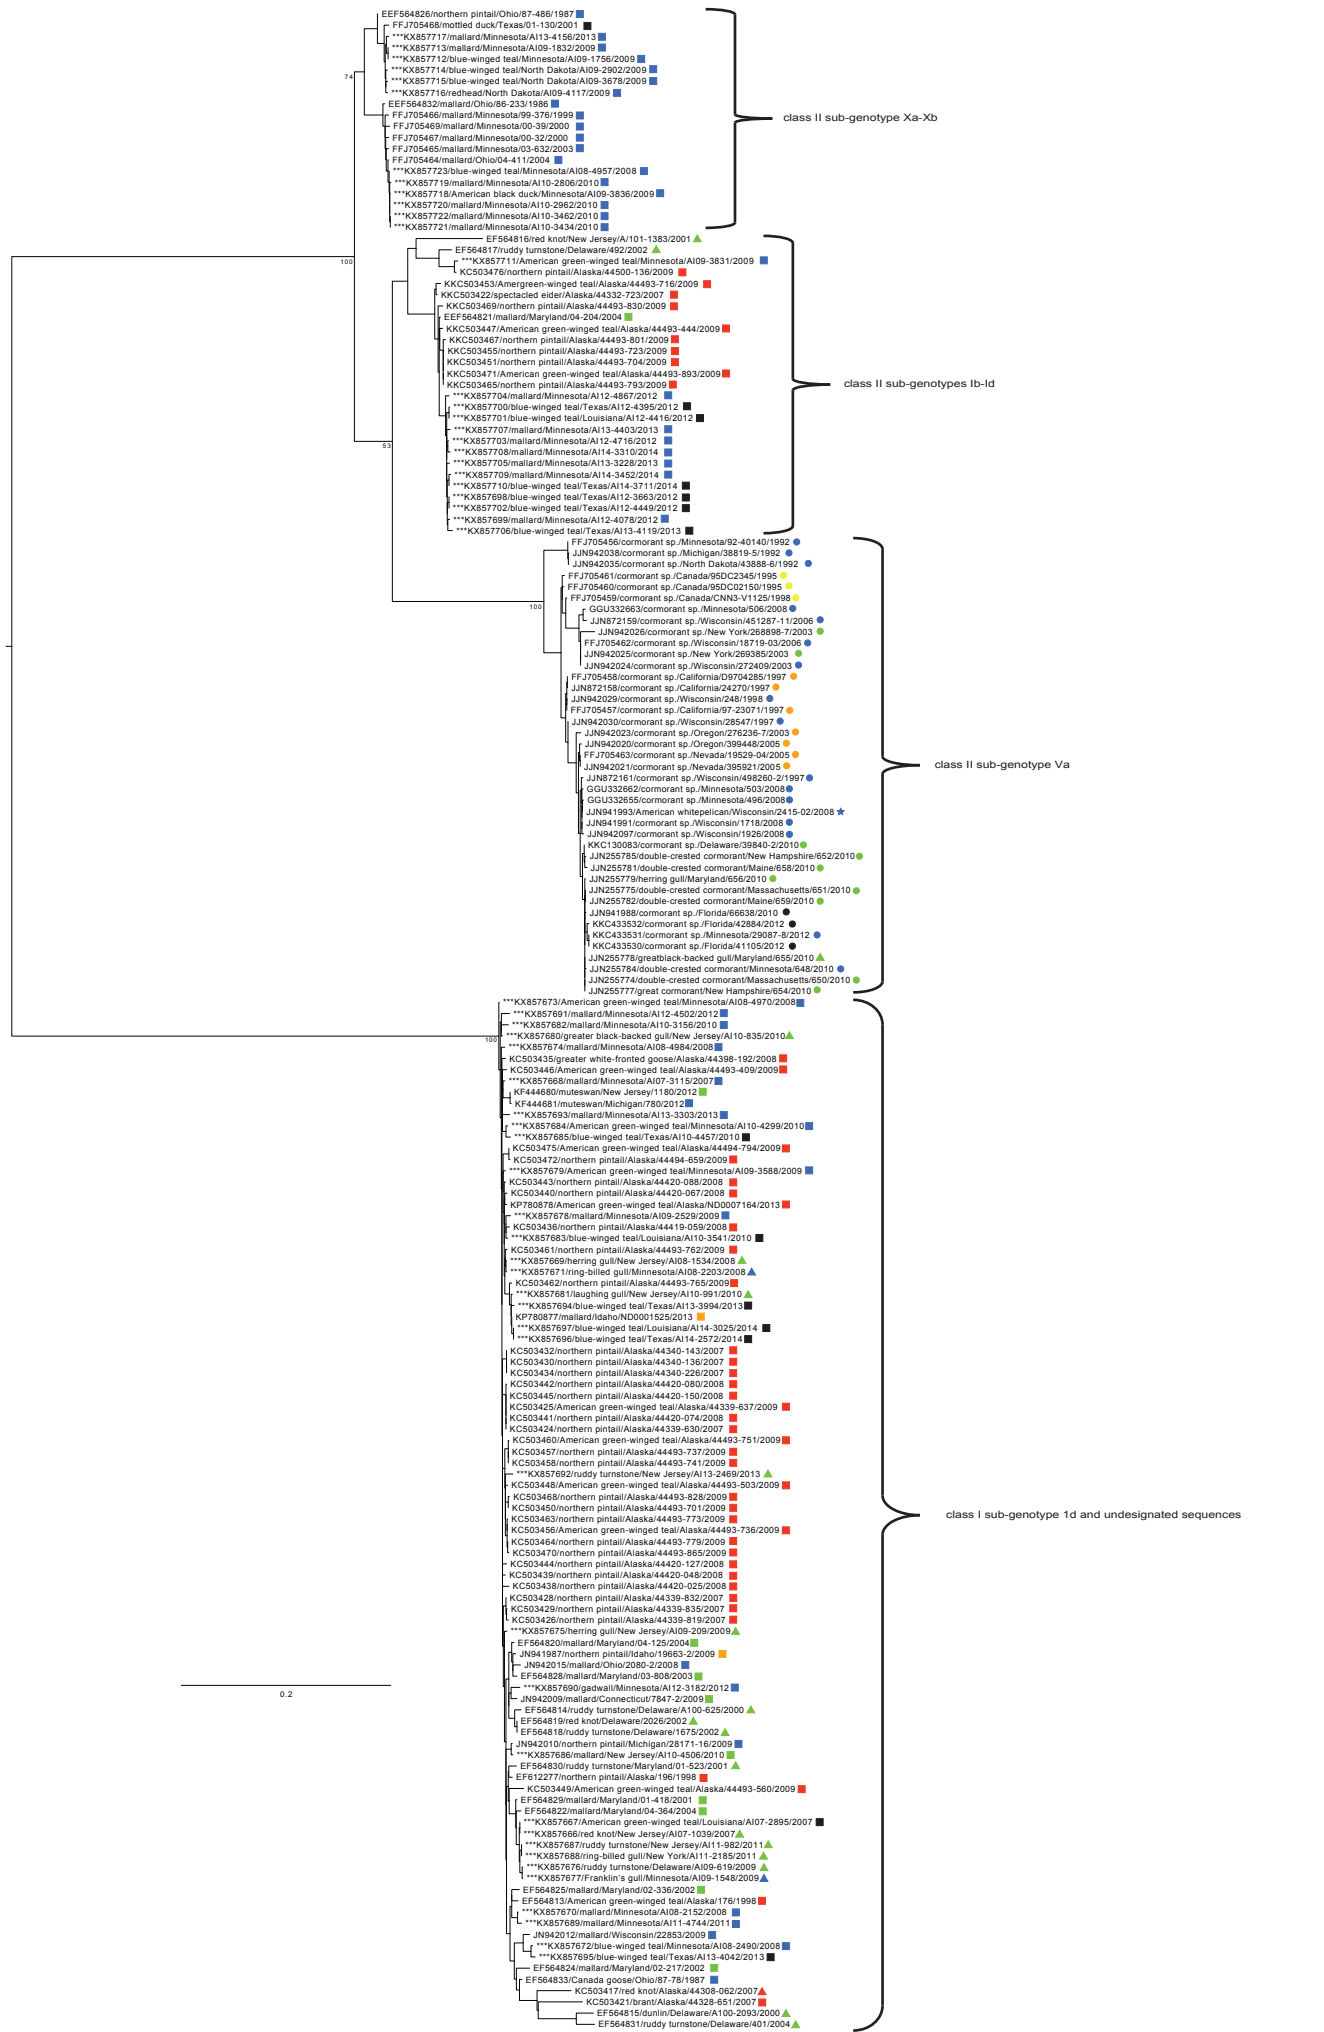

Supplement: MOESM2 [file 12111054]
